# Supplementary material for: The first record of the parasitic myrmecophilous caterpillar Liphyrabrassolis (Lepidoptera, Lycaenidae) inside Asian weaver ant (Oecophyllasmaragdina) nests in oil palm plantations
Source: Biodivers Data J. 2022 Aug 15;10:e83842. doi: 10.3897/BDJ.10.e83842 (PMC9848595; doi:10.3897/BDJ.10.e83842)
Supplement: Supplementary material 1 — L.brassolis field observation [file bdj-10-e83842-s001.xlsx]

## Sheet: Sheet9 (2)
no	date	time	location	long_cm	wide_cm	thick_cm	larva_occ	larva_condition
1	2021-08-18	16:43:00	LIBE D18	66	26	6	0
2	2021-08-18	17:27:00	LIBE C19	69	35	8	0
3	2021-08-19	16:34:00	LIBE C19	69	23	9	0
4	2021-08-19	16:54:00	LIBE D20	50	19	9	0
5	2021-08-19	17:20:00	LIBE D20	55	27	11	0
6	2021-08-19	17:51:00	LIBE D20	49	22	14	0
7	2021-08-21	12:38:00	LIBE D20	52	37	15	0
8	2021-08-21	13:08:00	LIBE D20	54	36	13	0
9	2021-08-21	13:24:00	LIBE D20	48	40	12	0
10	2021-08-21	13:46:00	LIBE D19	77	32	15	0
11	2021-08-24	16:35:00	LIBE E19	88	43	16	0
12	2021-08-24	16:57:00	LIBE E19	97	47	9	0
13	2021-08-24	17:20:00	LIBE E19	73	35	18	0
14	2021-08-24	17:39:00	LIBE E19	101	33	14	0
15	2021-08-25	17:00:00	LIBE E17	68	36	15	1	live
16	2021-08-25	17:21:00	LIBE E17	90	33	14	1	death
17	2021-08-25	17:49:00	LIBE E17	80	38	16	1	death
18	2021-08-28	12:41:00	LIBE E17	89	25	15	1	live
19	2021-08-28	13:20:00	LIBE E17	81	56	11	0
20	2021-08-28	13:52:00	LIBE E17	55	26	13	1	live
